# Supplementary material for: RNAi mediated inhibition of viroid infection in transgenic plants expressing viroid-specific small RNAs derived from various functional domains
Source: PubMed Central journal article supplement (PMC4677296; doi:10.1038/srep17949), 2015-12-14
Supplement: srep17949-s1.pdf [file srep17949-s1.pdf]

## Supplemental Information

**Table S1** Preliminary evaluation of hpPSTVd transgenic lines by PSTVd infection assay.

| Transgene             | Trsngenic line No. | 3-wpi             | 4-wpi | 5-wpi |
|-----------------------|--------------------|-------------------|-------|-------|
| hpPSTVd- $\Delta$ TLE | 24                 | 8/10 <sup>a</sup> | 9/10  | NT    |
|                       | 32                 | 8/10              | 8/10  | NT    |
|                       | 141                | 7/10              | 7/10  | NT    |
| Empty control         |                    | 8/10              | 10/10 | NT    |
| hpPSTVd- $\Delta$ P   | 71b                | 0/20              | 3/20  | 6/20  |
|                       | 82                 | 0/20              | 1/20  | 3/20  |
|                       | Empty control      | 0/20              | 2/20  | 8/20  |
| hpPSTVd-TL            | 144                | 0/20              | 17/20 | NT    |
|                       | 85                 | 0/20              | 10/20 | NT    |
|                       | 173                | 1/15              | 11/15 | NT    |
|                       | Empty control      | 7/20              | 14/20 | NT    |
| hpPSTVd-P-uppo        | 54                 | 4/20              | 15/20 | 16/20 |
|                       | 122                | 14/20             | 19/20 | 19/20 |
|                       | 141                | 11/20             | 12/20 | 17/20 |
|                       | 161                | 14/20             | 18/20 | 20/20 |
|                       | Empty control      | 17/20             | 18/20 | 19/20 |
| hpPSTVd-CCR-uppo      | 65                 | 18/20             | 18/20 | 19/20 |
|                       | 114                | 13/20             | 18/20 | 19/20 |
|                       | 12                 | 13/20             | 17/20 | 20/20 |
|                       | 131                | 14/20             | 19/20 | 19/20 |
|                       | Empty control      | 17/20             | 18/20 | 19/20 |
| hpPSTVd-CCR-dopo      | 81                 | 14/20             | 14/20 | 15/20 |
|                       | Empty control      | 17/20             | 18/20 | 19/20 |
| hpPSTVd-257a          | 24                 | 3/10              | 9/10  | 10/10 |
|                       | 25                 | 1/10              | 5/10  | 7/10  |
|                       | 22                 | NT <sup>b</sup>   | NT    | NT    |
|                       | 60                 | 7/10              | 9/10  | 10/10 |
|                       | Empty control      |                   | 10/10 | 10/10 |

<sup>a</sup> Number of plants infected/inoculated

<sup>b</sup> Not tested

**Table S2** Challenge inoculation assay of transgenic *N. benthamiana* lines expressing hpPSTVd-257a by TCDVd for analyzing cross protection against related viroid.

| Transgene    | Transgenic line (promoter) | 3-wpi <sup>a</sup> | 4-wpi | 5-wpi |
|--------------|----------------------------|--------------------|-------|-------|
| hpPSTVd:257a | 24 (CaMV-35S)              | 10/10 <sup>b</sup> | 10/10 | 10/10 |
|              | 25 (CaMV-35S)              | 10/10              | 10/10 | 10/10 |
| Empty vector | (CaMV-35S)                 | 10/10              | 10/10 | 10/10 |

<sup>a</sup> weeks post inoculation.

<sup>b</sup> Number of plants infected/inoculated

**Table S3** List of oligonucleotides used in this study for preparing the IR constructs.

| Name                    | RE site addition | Sequence                                 | Product                        |
|-------------------------|------------------|------------------------------------------|--------------------------------|
| intFW <sup>a</sup>      | <i>Aat</i> II    | GCGACGTCCTACAGGGTAAATTCTAGT<br>TTTTC     | CAT1 intron                    |
| intRV <sup>a</sup>      | <i>Hind</i> III  | GCGACGTCCTACAGGGTAAATTCTAGT<br>TTTTC     |                                |
| tPSTVd sFW <sup>a</sup> | <i>Bgl</i> II    | GCAGATCTGGTTCCTGTGGTTCACAC               | hpPSTVd:ΔTLE<br>and hpPSTVd:ΔP |
| tPSTVd sRV <sup>a</sup> | <i>Aat</i> II    | GCGACGTCACCAACTGCGGTTCCAAG               |                                |
| tPSTVd aFW <sup>a</sup> | <i>Hind</i> III  | GCAAGCTTACCAACTGCGGTTCCAAG               |                                |
| tPSTVd aRV <sup>a</sup> | <i>Kpn</i> I     | CTGGTACCGGTTCTGTGGTTCACAC                |                                |
| TL sFPBg                | <i>Bgl</i> II    | GCAGATCTCTTCGGGGCGAGGGTG                 |                                |
| TL sRPA                 | <i>Aat</i> II    | GCGACGTCCTCAGGAGGTCAGGTGTG               | hpPSTVd:ΔTL                    |
| TL aFPH                 | <i>Hind</i> III  | GCAAGCTTCTCAGGAGGTCAGGTGTG               |                                |
| TL aRPK                 | <i>Kpn</i> I     | CTGGTACCCCTTCGGGGCGAGGGTG                |                                |
| P Suppo FPBg            | <i>Bgl</i> II    | TTAGATCTCAGAAAAGAAAAAGAAGG               |                                |
| P Suppo RPA             | <i>Aat</i> II    | GCGACGTCAGGAGCCGCCTTCTTTTTTC             | hpPSTVd:Puppo                  |
| P Auppo FPA             | <i>Hind</i> III  | GCGACGTCAGGAGCCGCCTTCTTTTTTC             |                                |
| P Auppo RPK             | <i>Kpn</i> I     | CTGGTACCCAGAAAAGAAAAAGAAGG               |                                |
| CCR Suppo FPBg          | <i>Bgl</i> II    | TTAGATCTGAGGAGCGCTTCAGGGATC<br>CCCCGGG   |                                |
| CCR Suppo RPA           | <i>Aat</i> II    | GCGACGTCCTTTGCCAGTTCGCTCCAG<br>GTTTCCCCG | hpPSTVd:CCRp<br>po             |
| CCR Auppo FPA           | <i>Hind</i> III  | GCGACGTCCTTTGCCAGTTCGCTCCAG<br>GTTTCCCCG |                                |
| CCR Auppo RPK           | <i>Kpn</i> I     | CTGGTACCGAGGAGCGCTTCAGGGAT<br>CCCCGGG    |                                |
| CCR Sdopo FPBg          | <i>Bgl</i> II    | TTAGATCTTGCCTGTGCTTCGGCTA<br>CTACCCGG    |                                |
| CCR Sdopo RPA           | <i>Aat</i> II    | GCGACGTCGGAGCTTCAGTTGTTTCCA<br>CCGGG     | hpPSTVd:CCRdo<br>po            |
| CCR Adopo FPA           | <i>Hind</i> III  | GCGACGTCGGAGCTTCAGTTGTTTCCA<br>CCGGG     |                                |
| CCR Adopo RPK           | <i>Kpn</i> I     | CTGGTACCTGCGCTGTGCTTCGGCTA<br>CTACCCGG   |                                |

---

|         |                                |                                                                                                                 |              |
|---------|--------------------------------|-----------------------------------------------------------------------------------------------------------------|--------------|
| siR257a | <i>Bam</i> HI,<br><i>Kpn</i> I | TTGGATCCCACCGGGTAGTAGCCGAA<br>GCGACAGCGCAAAGGGGGCGAGTTTC<br>CTCGCCCCCTTTGCGCTGTCGCTTCGG<br>CAACTACCGGTGGGTACCTT | hpPSTVd:257a |
|---------|--------------------------------|-----------------------------------------------------------------------------------------------------------------|--------------|

---

<sup>a</sup> Kasai et al., <sup>1</sup>

Underlined nucleotides denote restriction endonuclease site.

Small lettered nucleotides denote the linker sequence.

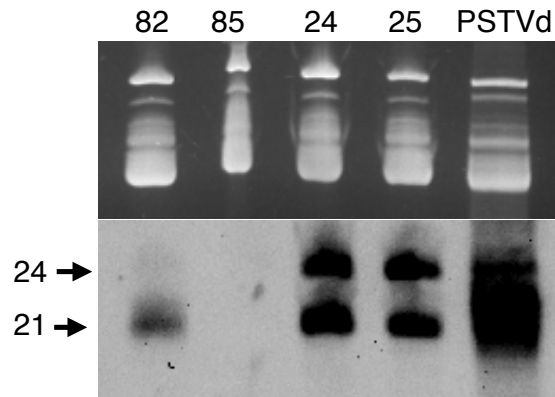

**Figure S1** Gel-blot hybridization analysis of PSTVd-sRNA. The arrows indicate the PSTVd-sRNA of 21 – 24-nts. The amount of PSTVd-sRNA produced by the various transgenic lines was quantified. The relative expression levels of PSTVd-sRNA were variable depending on the lines. *Lane 82* hpPSTVd: $\Delta$ P-82, *lane 85* hpPSTVd:TL-85, *lane 24* hpPSTVd:257a-24, *lane 25* hpPSTVd:257a-25 and *lane PSTVd* PSTVd inoculated plant. The numbers below each lane represent the  $\mu$ g of RNA charged per lane.

**Figure S1 (Sano)**



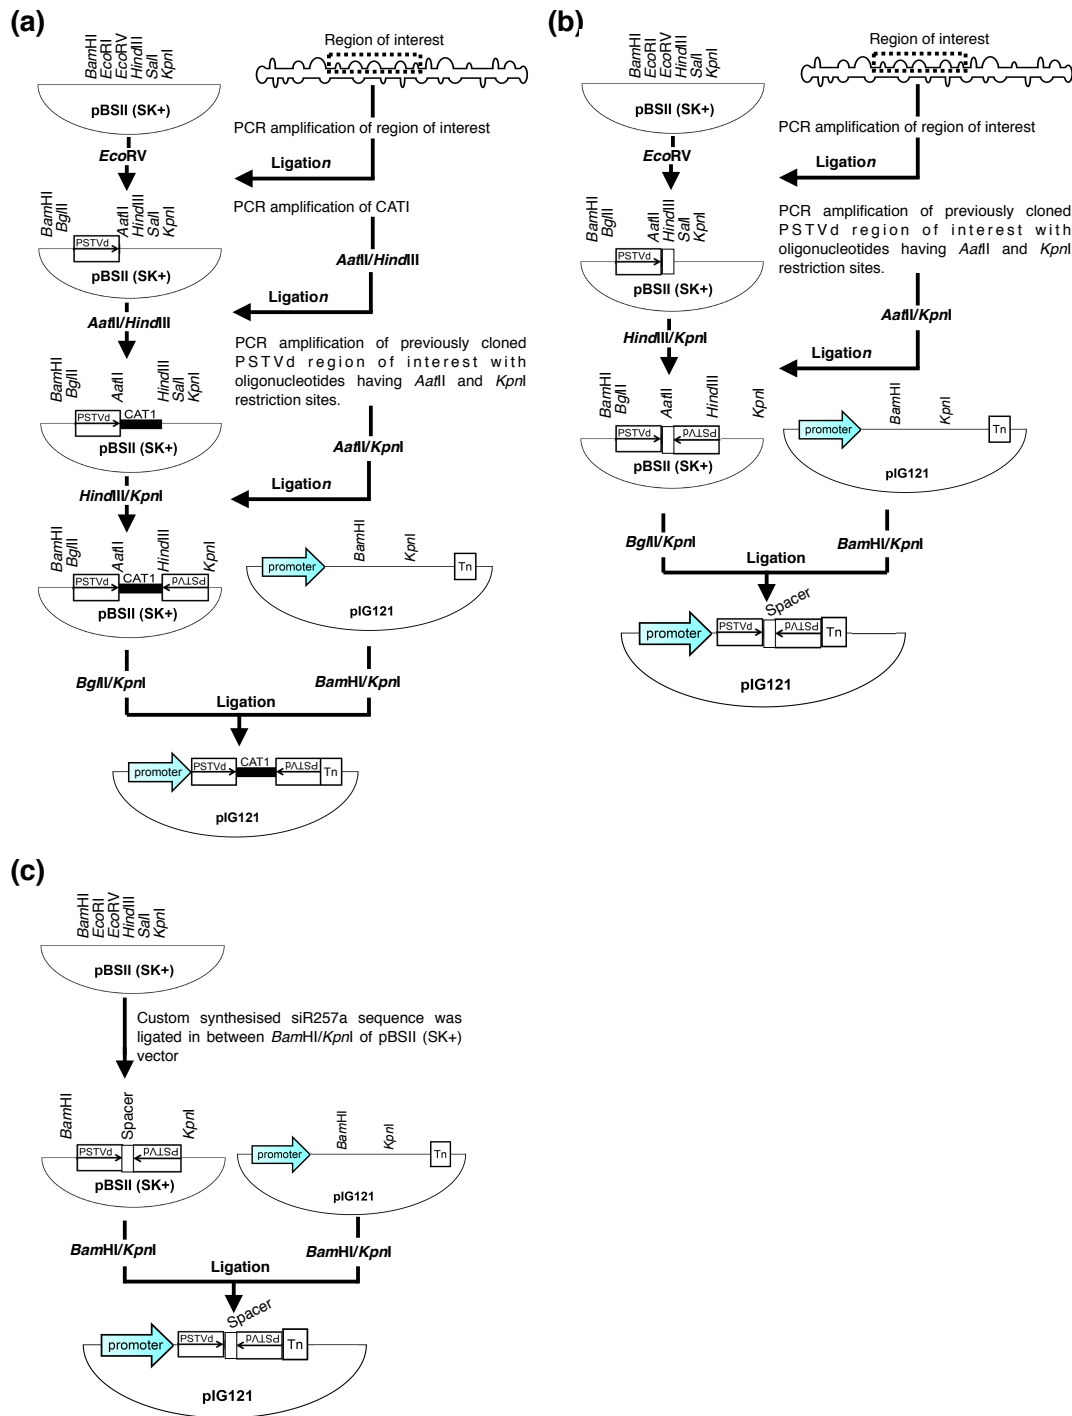

**Figure S3** Diagrammatic representation of steps involved in the preparation of the hairpin constructs derived from the various regions of PSTVd. The arrows inside the box indicate the direction of PSTVd sequence used. The IR sequence of the PSTVd is separated by (a) an intron for hpPSTVd:ΔTLE, hpPSTVd:ΔP and hpPSTVd:TL; while a small sequence was used as spacer for (b) hpPSTVd:Puppo, hpPSTVd:CCRuppo, hpPSTVd:CCRdopo; and, (c) si257a, respectively. The whole construct was inserted between the promoter (either CaMV-35S or CoMYV) and the Tn (nopaline synthase terminator) sequence of the vector pIG121.

**Figure S3 (Sano)**

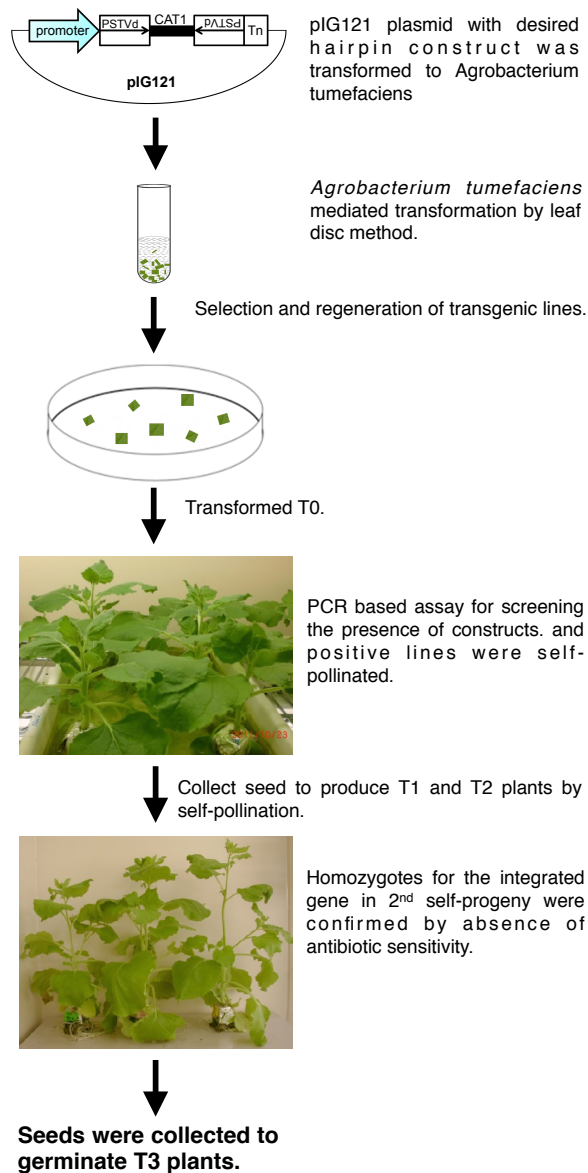

**Figure S4** The steps involved in the production of transgenic lines and in the subsequent generation of the T3 lines are shown schematically.

**Figure S4 (Sano)**



### **Supplemental information References**

1. Kasai, A., Sano, T. & Harada, T. Scion on a Stock Producing siRNAs of Potato Spindle Tuber Viroid (PSTVd) Attenuates Accumulation of the Viroid. *PLoS One* **8**, e57736 (2013).
